# Supplementary material for: Triangular-shaped Cu–Zn–In–Se-based nanocrystals with narrow near infrared photoluminescence
Source: Royal Society of Chemistry journal article supplement (doi:10.1039/d4nr04499a), 2025-01-01
Supplement: d4nr04499a1.pdf [file d4nr04499a1.pdf]

## Supporting Information

### Triangular-Shaped Cu-Zn-In-Se-based Nanocrystals with Narrow Near Infrared Photoluminescence

Ankita Bora,<sup>†</sup> Ningyuan Fu,<sup>†</sup> Avijit Saha,<sup>†</sup> Anatol Prudnikau,<sup>†</sup> Rene Hübner,<sup>§</sup> Houman Bahmani Jalali,<sup>Δ</sup> Francesco di Stasio,<sup>Δ</sup> Nikolai Gaponik,<sup>†</sup> Vladimir Lesnyak<sup>†,\*</sup>

<sup>†</sup>Physical Chemistry, TU Dresden, Zellescher Weg 19, 01069, Dresden, Germany

<sup>§</sup>Institute of Ion Beam Physics and Materials Research, Helmholtz-Zentrum Dresden-Rossendorf e.V., Bautzner Landstrasse 400, 01328, Dresden, Germany

<sup>Δ</sup>Photonic Nanomaterials, Istituto Italiano di Tecnologia, 16163, Genova, Italy

#### Synthesis of zinc oleate

A mixture of 0.99 g of  $\text{Zn}(\text{OAc})_2 \cdot 2\text{H}_2\text{O}$ , 7.2 mL of OlAc, and 18 mL of ODE in a 50-mL round-bottom flask connected to a Schlenk line was degassed at 50 °C for 30 min under vigorous stirring. The temperature was then increased to 160 °C under an argon atmosphere and subsequently lowered to 100 °C once a clear solution formed, indicating the formation of zinc oleate. Finally, while maintaining the temperature at 100 °C, 0.5 mL of OlAm were added and the product was transferred into a degassed vial for future use. Since zinc oleate solidifies at room temperature, it was reheated to approx. 80–100 °C using a heat gun before use.

#### Synthesis of sulfur precursor

0.2-molar sulfur stock solution was prepared by dissolving 64.1 mg (2 mmol) of S powder in 10 mL of dried ODE and stored in a degassed vial.

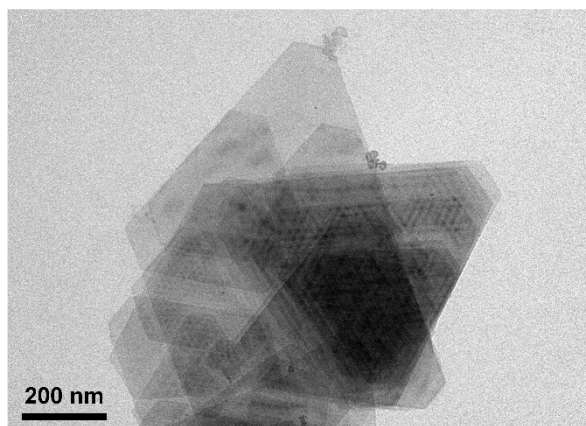

**Figure S1.** TEM image of  $\text{In}_2\text{Se}_3$  nanosheets.

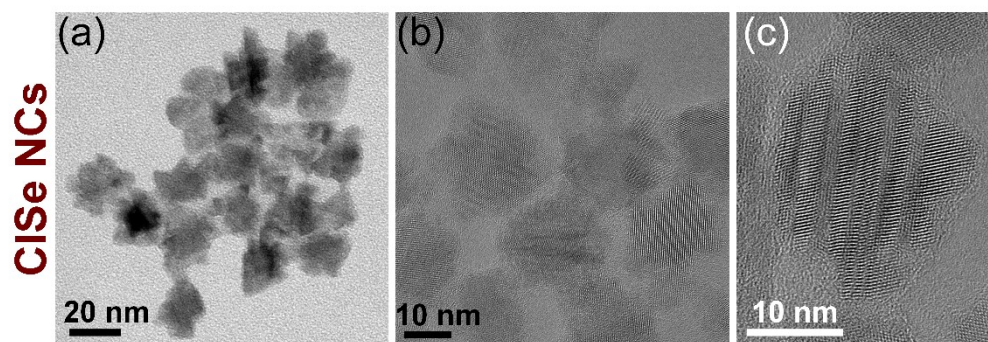

**Figure S2.** Conventional TEM (a) and HRTEM (b, c) images of CISE NCs, which reveal the stacking of triangular NPLs.

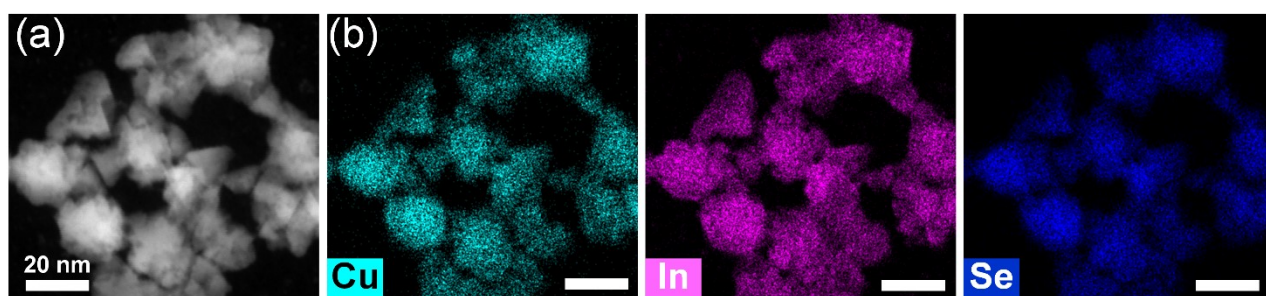

**Figure S3.** HAADF-STEM image of CISE NCs synthesized at 240 °C (a) and corresponding EDXS-based element maps (b) of Cu, In, and Se.

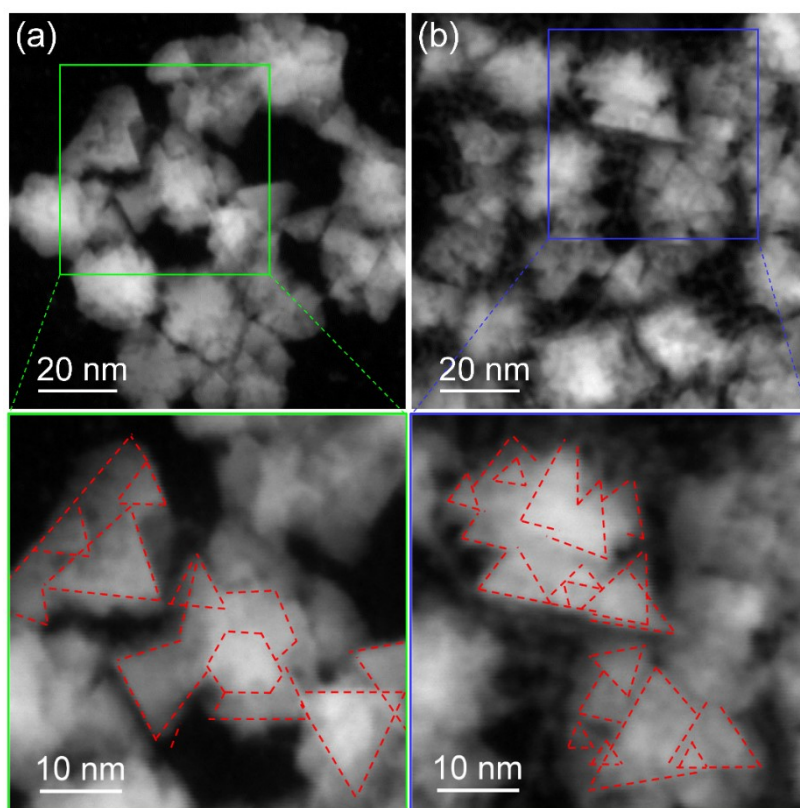

**Figure S4.** HAADF-STEM images of (a) CISE NCs (cf. Figure S3a) and (b) CZISE NCs (cf. Figure 3g) showing their triangular building blocks.

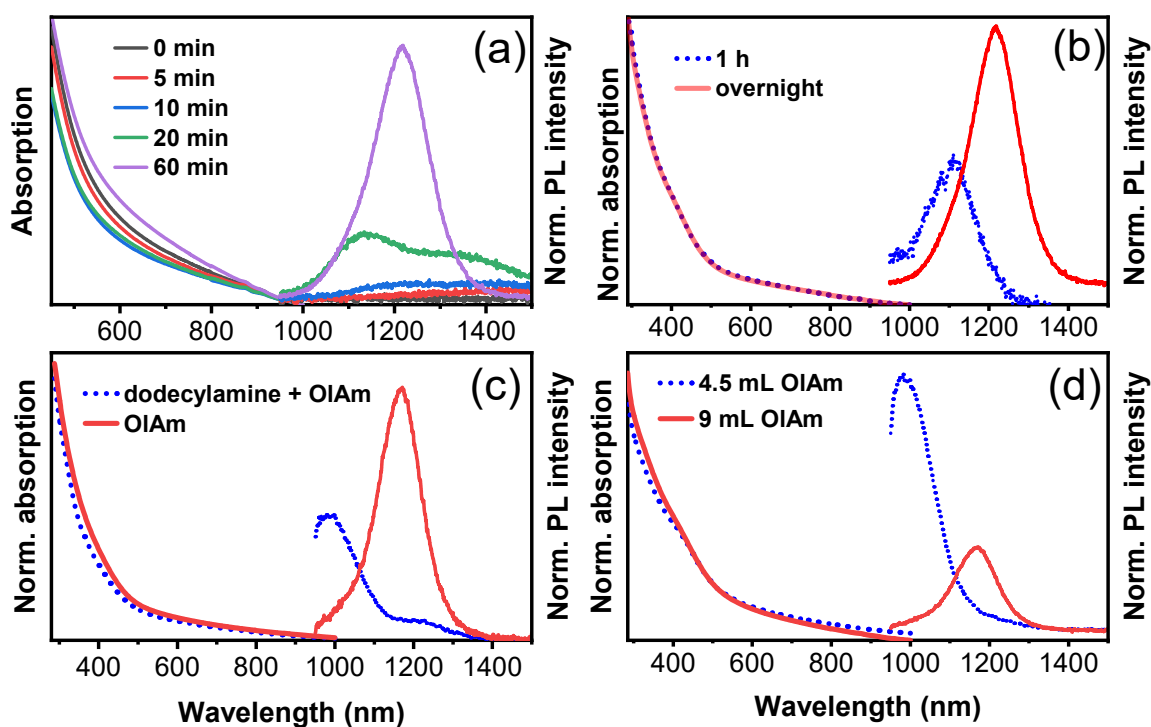

**Figure S5.** Absorption and PL spectra of: CZISE NC samples taken at 0, 5, 10, 20, and 60 min of the synthesis (a); CZISE NCs synthesized by Cu incorporation for 1 h and overnight (b), CZISE NCs synthesized with a mixture of ligands and a single ligand (c), CZISE NCs synthesized with 4.5 mL of OIAm and 9 mL of OIAm (d).

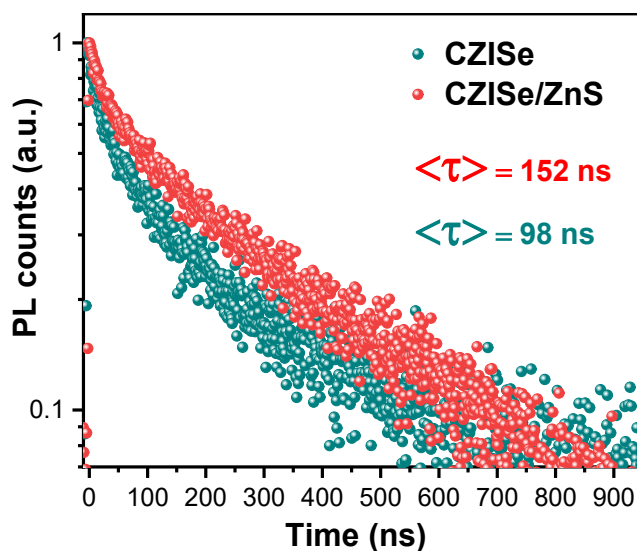

**Figure S6.** PL lifetime traces of CZISE and core/shell CZISE/ZnS NCs emitting at 1218 nm. The average PL lifetime was determined as the time when the initial signal intensity decreased to the maximum number of counts divided by  $e$ .
